# Supplementary material for: A Genomic Strategy to Refine Prognosis in Early-Stage Non–Small-Cell Lung Cancer
Source: Atypon-hosted journal article supplement (doi:10.1056/nejmoa060467), 2006-08-09

## Supplementary Appendix

This appendix has been provided by the authors to give readers additional information about their work.

Supplement to: Potti A, Mukherjee S, Petersen R, et al. A genomic strategy to refine prognosis in early-stage non–small-cell lung cancer. *N Engl J Med* 2006;355:570-580.

## **Methods:**

### **Patients and samples**

The initial analysis used 91 tumor samples of patients with early stage (Ia/Ib, IIa/IIb and IIIa) NSCLC, who also had clearly defined clinical outcome data, identified from the Duke Lung Cancer Prognostic Laboratory. We determined the percentage tumor content and histologic type of each tumor before RNA extraction. Of the 91 RNA samples, 89 were of sufficient quality for gene expression analysis. Our initial goal was to identify gene expression patterns characteristic of certain patient cohorts within the group. The cohort of patients with early-stage NSCLC was selected to have an equal mix of the two major histologic subtypes: squamous cell carcinoma and adenocarcinoma. In addition, each histologic subset had approximately equal number of patients who survived over 5 years and those who died within 2.5 years of initial diagnosis of a documented disease recurrence.

The ACOSOG Z0030 study is a completed prospective, multi-institutional phase III trial of 1100 patients with stage I NSCLC randomized to complete resection with mediastinal lymph node dissection or sampling. A subset of 416 patients had fresh-frozen tumor collected and banked at ACOSOG Central Specimen Bank at Washington University. Forty samples from patients with at least 28 months of follow-up were obtained for RNA extraction and microarray analysis. Of these, 25 cases were found to have both acceptable tumor cell content and adequate RNA quality for analysis. Approximately half ( $n = 13$ ) of these patients had died of cancer recurrence.

The CALGB 9761 study is a completed multi-institutional prospective phase II trial of approximately 500 patients with clinical stage I and II NSCLC, and was designed to assess the prognostic significance of micrometastatic disease using RT-PCR assay of expression of mucin-1 and carcinoembryonic antigen. Patients had fresh-frozen tumor and lymph nodes collected according to a rigorous, quality-controlled protocol such that high quality RNA was extracted from over 90% of tumors. The RNA samples derived from tumors of 84 patients were analyzed by microarray analysis (using Affymetrix U133A GeneChip). This was a blinded external validation step: the gene expression-based predictions of recurrence were made without a priori knowledge of the outcome and were independently validated with clinical outcome (survival) by a CALGB statistician. The mean follow-up for patients in this group was 5.3 years. There were 34 patients with recurrence, and 50 patients who were disease free at the time of follow-up. None of the patients in the Duke, ACOSOG, and CALGB cohorts received adjuvant chemotherapy or external beam radiation. Table 1 provides a summary of the clinical and demographic characteristics of the patients enrolled in the training (Duke), and validation (ACOSOG and CALGB) cohorts. Full details are provided in Supplementary Material (Supplementary Table-1).

## Methods:

**Tumor analyses.** Approximately 30 mg of lung cancer tissue was added to a chilled BioPulverizer H tube [Bio101 Systems, Carlsbad, CA]. Lysis buffer from the Qiagen RNeasy Mini kit was added and the tissue homogenized for 20 seconds in a Mini-Beadbeater [Biospec Products, Bartlesville, OK]. Tubes were spun briefly to pellet the garnet mixture and reduce foam. The lysate was transferred to a new 1.5 ml tube using a syringe and 21 gauge needle, followed by passage through the needle 10 times to shear genomic DNA. Total RNA was extracted from tumors using the Qiagen RNeasy Mini kit. The samples from the Duke Cohort and ACOSOG Z0030 were prepared and arrayed using Affymetrix U133 plus 2.0 GeneChips at the Duke Microarray Facility, and the samples from CALGB 9761 were prepared and arrayed using Affymetrix U133A GeneChips at the University of Michigan.

**Gene expression arrays.** For the Duke and ACOSOG samples, total RNA extracted from the tumor tissue with RNeasy kits (Qiagen, Nalencia, CA, USA) was assessed for quality with an Agilent 2100 Bioanalyzer (Agilent, Palo Alto, CA, USA). Hybridization targets (probes for hybridization) were prepared from total RNA according to standard Affymetrix protocols. The amount of starting total RNA for each reaction was 10 µg. Briefly, first-strand cDNA was generated using a T7- linked oligo-dT primer, followed by second-strand synthesis. An in vitro transcription reaction was performed to generate cRNA containing biotinylated UTP and CTP, which was then chemically fragmented at 95°C for 35 min. The fragmented, biotinylated cRNA was incubated in MES buffer (2-[N-morpholino]ethansulfonic acid) containing 0.5 mg/ml acetylated bovine serum albumin to the Affymetrix GeneChip Human U133 plus 2.0 arrays at 45°C for 16 hr, according to the directions of the manufacturer. The arrays contained over 54,000 probes, representing genes. Arrays were washed and stained with streptavidin-phycoerythrin (SAPE, Molecular Probes). Signal amplification was performed using a biotinylated anti-streptavidin antibody (Vector Laboratories, Burlingame, CA) at 3µg/ml. This was followed by a second staining with SAPE. Normal goat IgG (2 mg/ml) was used as a blocking agent. Scans were performed with an Affymetrix GeneChip scanner and the expression value for each gene was calculated using the Affymetrix Microarray Analysis Suite (v5.0), computing the expression intensities in 'signal' units defined by software. Scaling factors were determined for each hybridization based on an arbitrary target intensity of 500. Scans were rejected if the scaling factor exceeded a factor of 30. Expression was calculated using the robust multi-array average (RMA) algorithm implemented in the Bioconductor (<http://www.bioconductor.org>) extensions to the R statistical programming environment. RMA generates log-2 scaled measures of expression using a linear model robustly fit to background-corrected and quantile-normalized probe-level expression data and has been shown to have a better ability to detect differential expression in spike-in experiments. The probe sets were screened to remove control genes and those with a small variance and those expressed at low levels.

**Statistical analysis.** We carried out statistical analysis using the metagene construction and binary prediction tree analysis as previously described<sup>26-30</sup>. The initial step filtered out genes whose maximum expression did not exceed the median value of expression or did not vary more than two-fold across the samples, to remove genes with extremely low levels of expression or little variance. The remaining genes (approximately 20,700) were then used to generate a model in which a restricted set of differentially expressed genes could distinguish the comparison groups and ultimately predict recurrence. This set of genes was then further screened by computing the simple correlation between expression of each gene and the binary recurrence outcome across samples, ranking genes by the strength of correlation and then restricting the focus to the top 10% (about 2070 genes). These genes were then clustered and used to compute metagene summaries as described below.

In the leave-one-out cross-validation analyses of the Duke training data, this process of gene screening and selection was reapplied for each sample. K-means clustering was used to create groupings of genes with between 15 and 50 genes per cluster, and a single metagene expression summary was computed for each group. The metagene for a cluster of genes is the dominant singular factor (principal component), computed using a singular value decomposition of expression levels of the genes in the metagene cluster on all samples. It represents the dominant average expression pattern of the cluster across tumor samples<sup>26</sup>. The set of metagenes and clinical factors are then used in binary classification tree analysis to recursively partition the samples into smaller subsets within which predictions of recurrence (0 = 5 year disease-free survival from diagnosis of recurrence, 1 = death within 2.5 years from diagnosis of recurrence) are made in terms of estimated relative probabilities<sup>27, 31, 32</sup>. The analysis computes and weighs many such trees, and integrates them to provide overall risk predictions for each individual patient. By identifying the subset of metagenes receiving the highest weight across the trees, we identified the corresponding clusters of genes that most heavily contribute to overall risk predictions<sup>26</sup>. The dominant metagenes that constitute the final model are described in the online Supplement.

To compare the prognostic efficacy of genomic and clinical strategies, clinical variables previously shown to be of prognostic value (age, gender, tumor size, stage of disease, histologic subtype and smoking history) were treated as factors or principal components (similar to metagenes in the genomic model) in a classification tree analysis to generate a 'clinical model', identical to the approach used to create the genomic model. The end result is a probability of recurrence which represents the conglomerate prognostic value of the individual clinical variables. Using Graphpad software, we computed a c-statistic (comparable to area under the curve in a receiver operated characteristic (ROC) curve when predicting binary outcomes) for the model including just the clinical variables, a c-statistic for a model that included the genomic prediction of recurrence, and a c-statistic for a model that included both clinical and genomic variables.

Accuracy of a model was defined using the 50% probability as the cut-off - if the model's estimate for probability of recurrence was >50%, the patient was classified as high risk (i.e., the model predicts recurrence). And if the model estimates a probability of recurrence <50%, the patient is classified as being at low risk for recurrence.

**Supplementary Table 1.** Summary of the individual clinical, demographic, and outcome characteristics of the patients enrolled in the training (Duke), and validation (ACOSOG and CALGB) cohorts.

**Supplementary Table 2. Genes in the metagenes selected for predicting recurrence.**  
The genes contained in the top 9 metagenes selected in the tree model analyses together with Gene Ontology (GO) annotations.

**Supplementary Figure 1. Prediction of recurrence based on the genomic model as a function of NSCLC stage.**

A. Predictions of recurrence as a function of clinical stage.  
B. Kaplan Meier estimates of survival by stage of NSCLC using the genomic model. The red curve represents patients predicted to be at high risk (>50% probability of recurrence) and the blue curve represents patients predicted to be at low risk (<50% probability of recurrence). Tick marks indicate patients whose data were censored by the time of last follow up OR owing to death.

**Supplementary Figure 2. Prediction of recurrence as a function of histological subtype.**

A. Same as in Supplementary Figure 2, red symbols indicate patients with recurrence and blue symbols indicate those without recurrence.  
B. Kaplan Meier estimates of survival as a function of histologic subtype. Tick marks indicate patients whose data were censored by the time of last follow up OR owing to death.

**Supplementary Figure 3. The performance of the metagene model to a previously published squamous NSCLC dataset (courtesy Dr. Zhifu Sun, Mayo Clinic).**

The predictive model generated with the entire Duke set of samples was used to estimate recurrence probabilities for the ACOSOG samples. Red symbols (▲) indicate patients with recurrence and blue symbols (■) indicate those without recurrence.

Supplementary Table 1.

| Sample Set | Sex | Histology | Age | Stage | Status(A/D) |
|------------|-----|-----------|-----|-------|-------------|
| Duke       | F   | S         | 73  | IV    | 1           |
| Duke       | M   | S         | 66  | 2A    | 1           |
| Duke       | F   | A         | 72  | 1B    | 0           |
| Duke       | F   | S         | 66  | 1B    | 1           |
| Duke       | F   | A         | 68  | 1A    | 0           |
| Duke       | M   | S         | 69  | 1A    | 0           |
| Duke       | F   | S         | 68  | 1A    | 0           |
| Duke       | F   | A         | 69  | 1A    | 1           |
| Duke       | F   | S         | 73  | 1B    | 1           |
| Duke       | F   | A         | 63  | 1A    | 1           |
| Duke       | M   | A         | 51  | 1B    | 1           |
| Duke       | M   | S         | 62  | 1A    | 1           |
| Duke       | F   | A         | 65  | 1A    | 1           |
| Duke       | F   | A         | 69  | 1A    | 0           |
| Duke       | M   | A         | 72  | 1B    | 1           |
| Duke       | F   | S         | 68  | 1B    | 0           |
| Duke       | M   | S         | 76  | 1B    | 1           |
| Duke       | M   | A         | 69  | 2B    | 0           |
| Duke       | M   | A         | 67  | 1A    | 0           |
| Duke       | M   | S         | 75  | 1A    | 0           |
| Duke       | M   | A         | 65  | 1B    | 1           |
| Duke       | M   | S         | 57  | 2A    | 0           |
| Duke       | F   | A         | 54  | 1A    | 0           |
| Duke       | M   | A         | 53  | 1B    | 1           |
| Duke       | M   | S         | 51  | 1B    | 0           |
| Duke       | M   | S         | 66  | 1A    | 0           |
| Duke       | F   | S         | 64  | 1B    | 1           |
| Duke       | M   | S         | 74  | 1B    | 0           |
| Duke       | M   | S         | 51  | 1B    | 1           |
| Duke       | M   | S         | 69  | 1B    | 0           |
| Duke       | M   | S         | 80  | 2B    | 1           |
| Duke       | F   | A         | 73  | 1B    | 1           |
| Duke       | F   | S         | 48  | 1B    | 0           |
| Duke       | M   | S         | 65  | 1A    | 0           |
| Duke       | M   | S         | 65  | 1A    | 0           |
| Duke       | M   | S         | 70  | 2B    | 1           |
| Duke       | M   | A         | 69  | 2B    | 0           |
| Duke       | M   | A         | 54  | 1A    | 1           |
| Duke       | M   | S         | 82  | 1A    | 0           |
| Duke       | M   | S         | 54  | 1A    | 0           |
| Duke       | M   | S         | 73  | 1B    | 1           |
| Duke       | M   | A         | 57  | 1A    | 0           |
| Duke       | M   | S         | 68  | 2B    | 1           |
| Duke       | M   | S         | 32  | 2A    | 0           |
| Duke       | F   | A         | 57  | 1A    | 0           |
| Duke       | F   | S         | 64  | 2B    | 0           |
| Duke       | F   | A         | 70  | 1A    | 0           |
| Duke       | F   | A         | 68  | 1A    | 1           |
| Duke       | M   | A         | 64  | 1A    | 0           |
| Duke       | M   | A         | 73  | 1A    | 1           |
| Duke       | F   | A         | 43  | 1B    | 0           |
| Duke       | F   | A         | 63  | 1A    | 1           |

|            |   |   |    |      |   |             |
|------------|---|---|----|------|---|-------------|
| Duke       | M | A | 75 | 1A   | 0 |             |
| Duke       | F | A | 68 | 3A   | 0 |             |
| Duke       | M | S | 69 | 1B   | 1 |             |
| Duke       | F | S | 57 | 1A   | 0 |             |
| Duke       | M | A | 55 | 1A   | 0 |             |
| Duke       | M | S | 64 | 1B   | 1 |             |
| Duke       | F | S | 47 | 1B   | 1 |             |
| Duke       | F | A | 67 | 2B   | 1 |             |
| Duke       | F | A | 75 | 1A   | 0 |             |
| Duke       | M | A | 73 | 1B   | 1 |             |
| Duke       | M | A | 70 | 2B   | 1 |             |
| Duke       | M | S | 73 | 1B   | 1 |             |
| Duke       | M | A | 56 | 2B   | 1 |             |
| Duke       | M | A | 65 | 2A   | 1 |             |
| Duke       | M | A | 66 | 1A   | 0 |             |
| Duke       | M | S | 58 | 1B   | 1 |             |
| Duke       | M | S | 79 | 1A   | 0 |             |
| Duke       | F | S | 66 | 1B   | 0 |             |
| Duke       | M | S | 76 | 1B   | 1 |             |
| Duke       | M | A | 71 | 1B   | 0 |             |
| Duke       | M | A | 67 | 3A   | 1 |             |
| Duke       | M | S | 55 | 2B   | 1 |             |
| Duke       | F | A | 79 | 3A   | 1 |             |
| Duke       | M | S | 81 | 3A   | 1 |             |
| Duke       | M | A | 83 | 1A   | 0 |             |
| Duke       | M | A | 62 | 1A   | 0 |             |
| Duke       | F | A | 66 | 1A   | 1 |             |
| Duke       | M | S | 60 | 1A   | 1 |             |
| Duke       | M | S | 68 | 1B   | 0 |             |
| Duke       | F | S | 83 | 1A   | 0 |             |
| Duke       | M | S | 72 | 2A   | 1 |             |
| Duke       | M | S | 55 | 1B   | 0 |             |
| Duke       | F | A | 69 | 1B   | 0 |             |
| Duke       | M | A | 50 | 1B   | 1 |             |
| Duke       | F | A | 68 | 1A   | 0 |             |
| Duke       | F | S | 55 | 2B   | 1 |             |
| Duke       | F | A | 76 | IB   | 0 | Identifieur |
| CALGB 9761 | M | A | 70 | IB   | 1 | 87290       |
| CALGB 9761 | M | A | 58 | IB   | 0 | 78918       |
| CALGB 9761 | F | A | 48 | IB   | 1 | 83787       |
| CALGB 9761 | M | A | 82 | IIB  | 1 | 85152       |
| CALGB 9761 | M | A | 62 | IA   | 1 | 86281       |
| CALGB 9761 | M | A | 82 | IIIB | 1 | 79124       |
| CALGB 9761 | M | A | 68 | IA   | 0 | 79124       |
| CALGB 9761 | M | A | 58 | IB   | 0 | 83790       |
| CALGB 9761 | M | A | 63 | IA   | 1 | 87135       |
| CALGB 9761 | M | A | 78 | IIB  | 1 | 86011       |
| CALGB 9761 | F | A | 57 | IB   | 1 | 79525       |
| CALGB 9761 | F | A | 77 | IA   | 0 | 78503       |
| CALGB 9761 | F | A | 86 | IIIB | 1 | 79189       |
| CALGB 9761 | F | A | 78 | IIIB | 0 | 79176       |
| CALGB 9761 | M | A | 73 | IB   | 0 | 87255       |
| CALGB 9761 | F | A | 70 | IA   | 0 | 82247       |
| CALGB 9761 | F | A | 75 | IA   | 0 | 79629       |
| CALGB 9761 | F | A | 49 | IA   | 0 | 83505       |
| CALGB 9761 | F | A | 49 | IA   | 0 | 83057       |

|                  |   |   |    |      |   |       |
|------------------|---|---|----|------|---|-------|
| CALGB 9761       | F | A | 51 | IA   | 0 | 77996 |
| CALGB 9761       | M | A | 66 | IA   | 0 | 77960 |
| CALGB 9761       | F | A | 76 | IB   | 0 | 78290 |
| CALGB 9761       | F | A | 78 | IA   | 0 | 78328 |
| CALGB 9761       | M | A | 76 | IA   | 1 | 77946 |
| CALGB 9761       | F | A | 60 | IIIA | 1 | 77738 |
| CALGB 9761       | M | A | 73 | IA   | 1 | 78119 |
| CALGB 9761       | F | A | 70 | IV   | 0 | 78109 |
| CALGB 9761       | F | A | 72 | IB   | 0 | 70592 |
| CALGB 9761       | F | A | 55 | IIIB | 1 | 70888 |
| CALGB 9761       | F | A | 64 | IA   | 0 | 73916 |
| CALGB 9761       | F | A | 53 | IIB  | 0 | 71789 |
| CALGB 9761       | F | A | 77 | IA   | 0 | 71621 |
| CALGB 9761       | M | A | 55 | IA   | 0 | 77059 |
| CALGB 9761       | M | A | 67 | IB   | 1 | 69314 |
| CALGB 9761       | M | A | 53 | IIIB | 0 | 77556 |
| CALGB 9761       | F | A | 70 | IA   | 0 | 77430 |
| CALGB 9761       | F | A | 72 | IB   | 1 | 68864 |
| CALGB 9761       | F | A | 57 | IB   | 0 | 76295 |
| CALGB 9761       | M | A | 43 | IA   | 1 | 71886 |
| CALGB 9761       | F | A | 65 | IA   | 0 | 70719 |
| CALGB 9761       | F | A | 66 | IB   | 0 | 69914 |
| CALGB 9761       | F | A | 52 | IIA  | 1 | 75704 |
| CALGB 9761       | F | A | 69 | IA   | 0 | 70709 |
| CALGB 9761       | F | A | 33 | IB   | 0 | 70160 |
| CALGB 9761       | M | A | 59 | IIIA | 1 | 74083 |
| CALGB 9761       | M | A | 62 | IA   | 1 | 69526 |
| CALGB 9761       | F | A | 46 | IIA  | 0 | 86908 |
| CALGB 9761       | F | A | 63 | IIA  | 0 | 76021 |
| CALGB 9761       | M | A | 60 | IIA  | 1 | 82902 |
| CALGB 9761       | F | A | 43 | IIA  | 0 | 86908 |
| CALGB 9761       | F | A | 67 | IIA  | 0 | 76021 |
| CALGB 9761       | M | A | 50 | IIA  | 1 | 82902 |
| CALGB pilot/VAMC | M | A | 62 | 1b   | 0 |       |
| CALGB pilot/VAMC | M | A | 72 | 1b   | 1 |       |
| CALGB pilot/VAMC | M | A | 68 | 1a   | 1 |       |
| CALGB pilot/VAMC | M | A | 63 | 1a   | 0 |       |
| CALGB pilot/VAMC | M | A | 58 | 2b   | 1 |       |
| CALGB pilot/VAMC | M | A | 77 | 3a   | 1 |       |
| CALGB pilot/VAMC | M | A | 60 | 2a   | 0 |       |
| CALGB pilot/VAMC | M | A | 77 | 1b   | 0 |       |
| CALGB pilot/VAMC | M | A | 78 | 1a   | 1 |       |
| CALGB pilot/VAMC | M | A | 49 | 2a   | 0 |       |
| CALGB pilot/VAMC | M | A | 69 | 1b   | 1 |       |
| CALGB pilot/VAMC | M | A | 67 | 2a   | 1 |       |
| CALGB pilot/VAMC | M | A | 68 | 3a   | 0 |       |
| CALGB pilot/VAMC | M | A | 46 | 2b   | 0 |       |
| CALGB pilot/VAMC | M | A | 65 | 1a   | 0 |       |
| CALGB pilot/VAMC | M | A | 46 | 2b   | 1 |       |
| CALGB pilot/VAMC | M | A | 65 | 1a   | 1 |       |
| CALGB pilot/VAMC | M | A | 75 | 2b   | 1 |       |
| CALGB pilot/VAMC | M | A | 57 | 3b   | 1 |       |
| CALGB pilot/VAMC | M | A | 72 | 1b   | 0 |       |
| CALGB pilot/VAMC | M | A | 64 | 3a   | 1 |       |
| CALGB pilot/VAMC | M | A | 59 | 1b   | 0 |       |

|                  |   |   |    |    |   |
|------------------|---|---|----|----|---|
| CALGB pilot/VAMC | M | A | 65 | 1b | 0 |
| CALGB pilot/VAMC | M | A | 69 | 1a | 0 |
| CALGB pilot/VAMC | M | A | 77 | 1b | 1 |
| CALGB pilot/VAMC | M | A | 67 | 2b | 0 |
| CALGB pilot/VAMC | M | A | 67 | 1b | 0 |
| CALGB pilot/VAMC | M | A | 74 | 3a | 1 |
| CALGB pilot/VAMC | M | A | 68 | 3b | 0 |
| CALGB pilot/VAMC | M | A | 67 | 3a | 1 |
| CALGB pilot/VAMC | M | A | 57 | 1a | 1 |
| CALGB pilot/VAMC | M | A |    | 1b | 1 |
| ACOSOG           | M | S | 51 | 1B | 1 |
| ACOSOG           | M | S | 66 | 1A | 0 |
| ACOSOG           | F | S | 68 | 1B | 1 |
| ACOSOG           | F | A | 48 | 2B | 0 |
| ACOSOG           | M | S | 74 | 1B | 0 |
| ACOSOG           | M | S | 65 | 1A | 0 |
| ACOSOG           | M | S | 73 | 1B | 0 |
| ACOSOG           | F | S | 47 | 1B | 1 |
| ACOSOG           | M | A | 53 | 1B | 0 |
| ACOSOG           | M | S | 68 | 1B | 0 |
| ACOSOG           | M | A | 65 | 1B | 0 |
| ACOSOG           | F | S | 57 | 2A | 1 |
| ACOSOG           | M | A | 80 | 2B | 1 |
| ACOSOG           | F | S | 75 | 1B | 1 |
| ACOSOG           | F | A | 73 | 1B | 0 |
| ACOSOG           | M | S | 65 | 1A | 1 |
| ACOSOG           | M | A | 47 | 1B | 1 |
| ACOSOG           | M | S | 51 | 1B | 0 |
| ACOSOG           | F | A | 70 | 2B | 1 |
| ACOSOG           | M | A | 56 | 2B | 1 |
| ACOSOG           | M | A | 65 | 2A | 1 |
| ACOSOG           | M | A | 70 | 2B | 0 |
| ACOSOG           | M | A | 66 | 1A | 1 |
| ACOSOG           | F | S | 41 | 1A | 1 |
| ACOSOG           | F | S | 64 | 1B | 0 |

**Supplementary Table 2.**

| ProbeSet ID                 | Gene Title                                                                                              | Gene Symbol | GO Biological Process                                                                                                                             | GO Molecular Function                                                                                                             | GO Cellular Component                                                       |
|-----------------------------|---------------------------------------------------------------------------------------------------------|-------------|---------------------------------------------------------------------------------------------------------------------------------------------------|-----------------------------------------------------------------------------------------------------------------------------------|-----------------------------------------------------------------------------|
| <b>Mgene 79</b>             |                                                                                                         |             |                                                                                                                                                   |                                                                                                                                   |                                                                             |
| <a href="#">200983_x_at</a> | CD59 antigen p18-20 (antigen identified by monoclonal antibodies 16.3A5, EJ16, EJ30, EL32 and G344)     | CD59        | immune response cell surface receptor linked signal transduction blood coagulation                                                                | ---                                                                                                                               | membrane fraction plasma membrane                                           |
| <a href="#">201481_s_at</a> | phosphorylase, glycogen; brain                                                                          | PYGB        | carbohydrate metabolism glycogen catabolism                                                                                                       | phosphorylase activity transferase activity, transferring glycosyl groups                                                         | ---                                                                         |
| <a href="#">201627_s_at</a> | insulin induced gene 1                                                                                  | INSIG1      | metabolism cell proliferation                                                                                                                     | ---                                                                                                                               | ---                                                                         |
| <a href="#">202812_at</a>   | glucosidase, alpha; acid (Pompe disease, glycogen storage disease type II)                              | GAA         | carbohydrate metabolism glycogen catabolism generation of precursor metabolites and energy                                                        | hydrolase activity, hydrolyzing O-glycosyl compounds alpha-glucosidase activity                                                   | lysosome                                                                    |
| <a href="#">203796_s_at</a> | B-cell CLL/lymphoma 7A                                                                                  | BCL7A       | ---                                                                                                                                               | actin binding                                                                                                                     | ---                                                                         |
| <a href="#">203856_at</a>   | vaccinia related kinase 1                                                                               | VRK1        | protein amino acid phosphorylation                                                                                                                | protein serine/threonine kinase activity ATP binding transferase activity                                                         | ---                                                                         |
| <a href="#">205118_at</a>   | ---                                                                                                     | ---         | ---                                                                                                                                               | ---                                                                                                                               | ---                                                                         |
| <a href="#">206022_at</a>   | Norrie disease (pseudoglioma)                                                                           | NDP         | vacuole organization and biogenesis signal transduction cell-cell signaling neurogenesis visual perception perception of sound cell proliferation | growth factor activity                                                                                                            | extracellular space                                                         |
| <a href="#">206986_at</a>   | ---                                                                                                     | ---         | ---                                                                                                                                               | ---                                                                                                                               | ---                                                                         |
| <a href="#">208341_x_at</a> | chorionic somatomammotropin hormone 2                                                                   | CSH2        | signal transduction cell-cell signaling pregnancy                                                                                                 | growth hormone receptor binding hormone activity structural constituent of chorion (sensu Insecta)                                | extracellular region extracellular space                                    |
| <a href="#">208871_at</a>   | dentatorubral-pallidolusian atrophy (atrophin-1)                                                        | DRPLA       | central nervous system development                                                                                                                | protein binding                                                                                                                   | nucleus cytoplasm                                                           |
| <a href="#">209479_at</a>   | chromosome 6 open reading frame 80                                                                      | C6orf80     | ---                                                                                                                                               | receptor activity                                                                                                                 | ---                                                                         |
| <a href="#">210220_at</a>   | frizzled homolog 2 (Drosophila)                                                                         | FZD2        | establishment of tissue polarity G-protein coupled receptor protein signaling pathway development Wnt receptor signaling pathway                  | non-G-protein coupled 7TM receptor activity G-protein coupled receptor activity                                                   | integral to plasma membrane                                                 |
| <a href="#">210842_at</a>   | neuropilin 2                                                                                            | NRP2        | angiogenesis electron transport cell adhesion neurogenesis axon guidance                                                                          | receptor activity vascular endothelial growth factor receptor activity electron transporter activity semaphorin receptor activity | membrane fraction integral to membrane                                      |
| <a href="#">210890_x_at</a> | killer cell immunoglobulin-like receptor, two domains, long cytoplasmic tail, 1                         | KIR2DL1     | immune response negative regulation of natural killer cell activity                                                                               | receptor activity HLA-C specific inhibitory MHC class I receptor activity                                                         | integral to plasma membrane                                                 |
| <a href="#">211090_s_at</a> | PRP4 pre-mRNA processing factor 4 homolog B (yeast) PRP4 pre-mRNA processing factor 4 homolog B (yeast) | PRPF4B      | nuclear mRNA splicing, via spliceosome protein amino acid phosphorylation RNA splicing                                                            | protein serine/threonine kinase activity ATP binding transferase activity                                                         | nucleus                                                                     |
| <a href="#">211168_s_at</a> | regulator of nonsense transcripts 1                                                                     | RENT1       | mRNA catabolism, nonsense-mediated decay regulation of translational termination DNA restriction                                                  | RNA binding helicase activity protein binding ATP binding type III site-specific deoxyribonuclease activity hydrolase activity    | cytoplasm                                                                   |
| <a href="#">211207_s_at</a> | acyl-CoA synthetase long-chain family member 6                                                          | ACSL6       | lipid metabolism fatty acid metabolism acyl-CoA metabolism metabolism                                                                             | magnesium ion binding catalytic activity long-chain-fatty-acid-CoA ligase activity ligase activity                                | mitochondrial outer membrane peroxisomal membrane microsome plasma membrane |
| <a href="#">213457_at</a>   | malignant fibrous histiocytoma amplified sequence 1 MFHAS1                                              | MFHAS1      | small GTPase mediated signal transduction                                                                                                         | GTP binding                                                                                                                       | ---                                                                         |

| ProbeSet ID        | Gene Title                                                                                                | Gene Symbol | GO Biological Process                                                                                                                                                                                       | GO Molecular Function                                                                                                                                  | GO Cellular Component                                                 |
|--------------------|-----------------------------------------------------------------------------------------------------------|-------------|-------------------------------------------------------------------------------------------------------------------------------------------------------------------------------------------------------------|--------------------------------------------------------------------------------------------------------------------------------------------------------|-----------------------------------------------------------------------|
| <b>Mgene 40</b>    |                                                                                                           |             |                                                                                                                                                                                                             |                                                                                                                                                        |                                                                       |
| <u>200045_at</u>   | ATP-binding cassette, sub-family F (GCN20), member 1 ATP-binding cassette, sub-family F (GCN20), member 1 | ABCF1       | ---                                                                                                                                                                                                         | nucleotide binding ATP binding ATPase activity                                                                                                         | ---                                                                   |
| <u>200881_s_at</u> | DnaJ (Hsp40) homolog, subfamily A, member 1                                                               | DNAJA1      | protein folding response to unfolded protein signal transduction G-protein coupled receptor protein signaling pathway G-protein signaling, adenylate cyclase activating pathway pregnancy protein secretion | heat shock protein binding unfolded protein binding                                                                                                    | ---                                                                   |
| <u>200981_x_at</u> | GNAS complex locus                                                                                        | GNAS        | protein-nucleus import, docking signal transduction protein transport                                                                                                                                       | GTPase activity signal transducer activity GTP binding                                                                                                 | extracellular region heterotrimeric G-protein complex plasma membrane |
| <u>200995_at</u>   | Importin 7                                                                                                | IPO7        | protein modification proteolysis and peptidolysis neuropeptide signaling pathway metabolism                                                                                                                 | small GTPase regulatory/interacting protein activity binding RAN protein binding protein transporter activity                                          | soluble fraction nucleus nuclear pore cytoplasm                       |
| <u>201116_s_at</u> | carboxypeptidase E                                                                                        | CPE         | proteolysis and peptidolysis                                                                                                                                                                                | carboxypeptidase activity carboxypeptidase A activity carboxypeptidase E activity metallopeptidase activity hydrolase activity                         | plasma membrane                                                       |
| <u>201120_s_at</u> | progesterone receptor membrane component 1                                                                | PGRMC1      | ---                                                                                                                                                                                                         | receptor activity steroid binding                                                                                                                      | microsome integral to plasma membrane                                 |
| <u>201138_s_at</u> | Sjogren syndrome antigen B (autoantigen La)                                                               | SSB         | transcription from Pol III promoter RNA processing tRNA modification RNA-nucleus export histone mRNA metabolism                                                                                             | tRNA binding mRNA binding                                                                                                                              | nucleus cytoplasm ribonucleoprotein complex                           |
| <u>201159_s_at</u> | N-myristoyltransferase 1                                                                                  | NMT1        | N-terminal protein myristoylation protein-lipoylation                                                                                                                                                       | glycylpeptide N-tetradecanoyltransferase activity acyltransferase activity transferase activity                                                        | ---                                                                   |
| <u>201182_s_at</u> | chromodomain helicase DNA binding protein 4                                                               | CHD4        | chromatin assembly or disassembly regulation of transcription from Pol II promoter chromosome organization and biogenesis (sensu Eukaryota) protein ubiquitination chromatin modification                   | chromatin binding ATP-dependent DNA helicase activity ubiquitin-protein ligase activity ATP binding zinc ion binding                                   | ubiquitin ligase complex chromatin nucleus                            |
| <u>201455_s_at</u> | aminopeptidase puromycin sensitive                                                                        | NPEPPS      | proteolysis and peptidolysis                                                                                                                                                                                | aminopeptidase activity membrane alanyl aminopeptidase activity metallopeptidase activity zinc ion binding hydrolase activity                          | nucleus cytosol                                                       |
| <u>202666_s_at</u> | actin-like 6A                                                                                             | ACTL6A      | regulation of cell growth chromatin remodeling regulation of transcription, DNA-dependent signal transduction response to pest, pathogen or parasite chromatin modification                                 | chromatin binding motor activity structural constituent of cytoskeleton                                                                                | nucleus actin filament TIP60 histone acetyltransferase complex        |
| <u>203018_s_at</u> | synovial sarcoma, X breakpoint 2 interacting protein                                                      | SSX2IP      | cell adhesion                                                                                                                                                                                               | protein binding                                                                                                                                        | nucleus                                                               |
| <u>205556_at</u>   | msh homeo box homolog 2 (Drosophila)                                                                      | MSX2        | skeletal development regulation of transcription, DNA-dependent development                                                                                                                                 | transcription factor activity                                                                                                                          | nucleus                                                               |
| <u>206302_s_at</u> | nudix (nucleoside diphosphate linked moiety X)-type motif 4                                               | NUDT4       | intracellular signaling cascade cyclic nucleotide metabolism calcium-mediated signaling cyclic-nucleotide-mediated signaling regulation of RNA-nucleus export intracellular transport                       | diphosphoinositol-polyphosphate diphosphatase activity hydrolase activity                                                                              | intracellular                                                         |
| <u>209963_s_at</u> | erythropoietin receptor                                                                                   | EPOR        | signal transduction small GTPase mediated signal transduction                                                                                                                                               | erythropoietin receptor activity guanyl-nucleotide exchange factor activity                                                                            | integral to plasma membrane                                           |
| <u>210349_at</u>   | calcium/calmodulin-dependent protein kinase IV                                                            | CAMK4       | protein amino acid phosphorylation signal transduction                                                                                                                                                      | protein serine/threonine kinase activity calcium- and calmodulin-dependent protein kinase activity calmodulin binding ATP binding transferase activity | nucleus                                                               |
| <u>211442_x_at</u> | cytochrome P450, family 3, subfamily A, polypeptide 43                                                    | CYP3A43     | electron transport xenobiotic metabolism                                                                                                                                                                    | unspecific monooxygenase activity                                                                                                                      | membrane fraction endoplasmic reticulum microsome membrane            |
| <u>211444_at</u>   | ---                                                                                                       | ---         | ---                                                                                                                                                                                                         | ---                                                                                                                                                    | ---                                                                   |

|                             |                                                           |        |                                                                               |                                                              |                                                                                          |
|-----------------------------|-----------------------------------------------------------|--------|-------------------------------------------------------------------------------|--------------------------------------------------------------|------------------------------------------------------------------------------------------|
| <a href="#">211720_x_at</a> | ribosomal protein, large, P0 ribosomal protein, large, P0 | RPLP0  | protein biosynthesis translational elongation                                 | RNA binding structural constituent of ribosome               | intracellular ribosome<br>cytosolic large ribosomal subunit (sensu Eukaryota)            |
| <a href="#">211778_s_at</a> | zinc finger protein 339 zinc finger protein 339           | ZNF339 | regulation of transcription, DNA-dependent                                    | DNA binding zinc ion binding                                 | nucleus                                                                                  |
| <a href="#">212360_at</a>   | adenosine monophosphate deaminase 2 (isoform L)           | AMPD2  | purine nucleotide metabolism purine ribonucleoside monophosphate biosynthesis | AMP deaminase activity hydrolase activity                    | ---                                                                                      |
| <a href="#">212787_at</a>   | YLP motif containing 1                                    | YLPM1  | ---                                                                           | ---                                                          | nucleus                                                                                  |
| <a href="#">213244_at</a>   | secretory carrier membrane protein 4                      | SCAMP4 | protein transport                                                             | ---                                                          | integral to membrane<br>extracellular region<br>cytoskeleton integral to plasma membrane |
| <a href="#">213693_s_at</a> | Mucin 1, transmembrane                                    | MUC1   | ---                                                                           | actin binding hormone activity                               | ---                                                                                      |
| <a href="#">213935_at</a>   | abhydrolase domain containing 5                           | ABHD5  | proteolysis and peptidolysis aromatic compound metabolism                     | aminopeptidase activity peptidase activity                   | ---                                                                                      |
| <a href="#">214421_x_at</a> | cytochrome P450, family 2, subfamily C, polypeptide 9     | CYP2C9 | electron transport                                                            | monooxygenase activity (S)-limonene 7-monooxygenase activity | endoplasmic reticulum<br>microsome membrane                                              |

| ProbeSet ID        | Gene Title                                                          | Gene Symbol | GO Biological Process                                                                                                                                                                                                                                                                        | GO Molecular Function                                                                                                                                                     | GO Cellular Component                                                                                      |
|--------------------|---------------------------------------------------------------------|-------------|----------------------------------------------------------------------------------------------------------------------------------------------------------------------------------------------------------------------------------------------------------------------------------------------|---------------------------------------------------------------------------------------------------------------------------------------------------------------------------|------------------------------------------------------------------------------------------------------------|
| <b>Mgene 31</b>    |                                                                     |             |                                                                                                                                                                                                                                                                                              |                                                                                                                                                                           |                                                                                                            |
| <u>200834_s_at</u> | ribosomal protein S21                                               | RPS21       | protein biosynthesis cell differentiation                                                                                                                                                                                                                                                    | structural constituent of ribosome                                                                                                                                        | intracellular ribosome                                                                                     |
| <u>201037_at</u>   | phosphofructokinase, platelet                                       | PFKP        | glycolysis                                                                                                                                                                                                                                                                                   | magnesium ion binding 6-phosphofructokinase activity ATP binding kinase activity transferase activity                                                                     | cytoplasm 6-phosphofructokinase complex                                                                    |
| <u>201637_s_at</u> | fragile X mental retardation, autosomal homolog 1                   | FXR1        | apoptosis                                                                                                                                                                                                                                                                                    | nucleic acid binding RNA binding                                                                                                                                          | nucleolus cytoplasm polysome                                                                               |
| <u>201850_at</u>   | capping protein (actin filament), gelsolin-like                     | CAPG        | protein complex assembly response to pest, pathogen or parasite barbed-end actin filament capping                                                                                                                                                                                            | actin binding                                                                                                                                                             | nucleus F-actin capping protein complex                                                                    |
| <u>202325_s_at</u> | ATP synthase, H+ transporting, mitochondrial F0 complex, subunit F6 | ATP5J       | generation of precursor metabolites and energy ATP synthesis coupled proton transport proton transport                                                                                                                                                                                       | transporter activity hydrogen-transporting ATP synthase activity, rotational mechanism hydrogen-transporting ATPase activity, rotational mechanism                        | membrane fraction mitochondrion mitochondrial inner membrane proton-transporting two-sector ATPase complex |
| <u>204633_s_at</u> | ribosomal protein S6 kinase, 90kDa, polypeptide 5                   | RPS6KA5     | regulation of transcription, DNA-dependent protein amino acid phosphorylation proteolysis and peptidolysis response to stress epidermal growth factor receptor signaling pathway protein kinase cascade response to external stimulus histone phosphorylation response to chemical substance | catalytic activity protein serine/threonine kinase activity protein-tyrosine kinase activity ATP binding metalloproteinase activity zinc ion binding transferase activity | nucleus                                                                                                    |
| <u>204727_at</u>   | WD repeat and HMG-box DNA binding protein 1                         | WDHD1       | regulation of transcription, DNA-dependent                                                                                                                                                                                                                                                   | DNA binding                                                                                                                                                               | nucleoplasm cytoplasm                                                                                      |
| <u>207260_at</u>   | FEV (ETS oncogene family)                                           | FEV         | regulation of transcription, DNA-dependent transcription from Pol II promoter                                                                                                                                                                                                                | transcription factor activity transcription corepressor activity                                                                                                          | nucleus                                                                                                    |
| <u>209343_at</u>   | EF hand domain family, member D1                                    | EFHD1       | ---                                                                                                                                                                                                                                                                                          | calcium ion binding                                                                                                                                                       | ---                                                                                                        |
| <u>210381_s_at</u> | cholecystokinin B receptor                                          | CCKBR       | G-protein coupled receptor protein signaling pathway phospholipase C activation positive regulation of cytosolic calcium ion concentration digestion sensory perception feeding behavior cell proliferation positive regulation of cell proliferation                                        | rhodopsin-like receptor activity phosphoinositide phospholipase C activity receptor activity gastrin receptor activity phosphatidylinositol 3-kinase regulator activity   | integral to plasma membrane                                                                                |
| <u>212034_s_at</u> | exocyst complex component 7                                         | EXOC7       | exocytosis protein transport                                                                                                                                                                                                                                                                 | ---                                                                                                                                                                       | exocyst                                                                                                    |
| <u>212410_at</u>   | EF hand domain family, member A1                                    | EFHA1       | muscle development                                                                                                                                                                                                                                                                           | calcium ion binding                                                                                                                                                       | ---                                                                                                        |
| <u>212600_s_at</u> | ubiquinol-cytochrome c reductase core protein II                    | UQCRC2      | electron transport oxidative phosphorylation proteolysis and peptidolysis aerobic respiration                                                                                                                                                                                                | metalloendopeptidase activity ubiquinol-cytochrome-c reductase activity oxidoreductase activity                                                                           | mitochondrion mitochondrial electron transport chain                                                       |

| ProbeSet ID        | Gene Title                                                                 | Gene Symbol | GO Biological Process                                                                                                                                                                                 | GO Molecular Function                                                                                                                                                        | GO Cellular Component                                                |
|--------------------|----------------------------------------------------------------------------|-------------|-------------------------------------------------------------------------------------------------------------------------------------------------------------------------------------------------------|------------------------------------------------------------------------------------------------------------------------------------------------------------------------------|----------------------------------------------------------------------|
| <b>Mgene 19</b>    |                                                                            |             |                                                                                                                                                                                                       |                                                                                                                                                                              |                                                                      |
| <u>200908_s_at</u> | ---                                                                        | ---         | ---                                                                                                                                                                                                   | ---                                                                                                                                                                          | ---                                                                  |
| <u>203914_x_at</u> | hydroxyprostaglandin dehydrogenase 15-(NAD)                                | HPGD        | prostaglandin metabolism metabolism                                                                                                                                                                   | alcohol dehydrogenase activity prostaglandin-D synthase activity electron transporter activity 15-hydroxyprostaglandin dehydrogenase (NAD+) activity oxidoreductase activity | ---                                                                  |
| <u>204189_at</u>   | retinoic acid receptor, gamma                                              | RARG        | regulation of transcription, DNA-dependent development                                                                                                                                                | transcription factor activity steroid hormone receptor activity retinoic acid receptor activity                                                                              | nucleus                                                              |
| <u>204928_s_at</u> | solute carrier family 10 (sodium/bile acid cotransporter family), member 3 | SLC10A3     | transport sodium ion transport organic anion transport                                                                                                                                                | bile acid:sodium symporter activity symporter activity                                                                                                                       | integral to membrane                                                 |
| <u>205094_at</u>   | peroxisomal biogenesis factor 12                                           | PEX12       | protein ubiquitination                                                                                                                                                                                | ubiquitin-protein ligase activity protein binding zinc ion binding                                                                                                           | ubiquitin ligase complex peroxisome integral to peroxisomal membrane |
| <u>205734_s_at</u> | lymphoid nuclear protein related to AF4                                    | LAF4        | regulation of transcription, DNA-dependent development                                                                                                                                                | DNA binding                                                                                                                                                                  | nucleus                                                              |
| <u>205767_at</u>   | epiregulin                                                                 | EREG        | regulation of cell cycle angiogenesis epidermal growth factor receptor signaling pathway cell-cell signaling cell proliferation                                                                       | epidermal growth factor receptor binding growth factor activity                                                                                                              | extracellular space integral to plasma membrane                      |
| <u>206390_x_at</u> | platelet factor 4 (chemokine (C-X-C motif) ligand 4)                       | PF4         | immune response negative regulation of angiogenesis cytokine and chemokine mediated signaling pathway platelet activation immune cell chemotaxis negative regulation of megakaryocyte differentiation | chemokine activity heparin binding                                                                                                                                           | extracellular region                                                 |
| <u>207108_s_at</u> | Nipped-B homolog (Drosophila)                                              | NIPBL       | cell cycle                                                                                                                                                                                            | ---                                                                                                                                                                          | nucleus                                                              |
| <u>207572_at</u>   | ---                                                                        | ---         | ---                                                                                                                                                                                                   | ---                                                                                                                                                                          | ---                                                                  |
| <u>207814_at</u>   | defensin, alpha 6, Paneth cell-specific                                    | DEFA6       | xenobiotic metabolism response to pest, pathogen or parasite antimicrobial humoral response (sensu Vertebrata) defense response to bacteria defense response to fungi                                 | ---                                                                                                                                                                          | extracellular region                                                 |
| <u>211211_x_at</u> | SH2 domain protein 1A, Duncan's disease (lymphoproliferative syndrome)     | SH2D1A      | cellular defense response intracellular signaling cascade cell-cell signaling                                                                                                                         | SH3/SH2 adaptor protein activity                                                                                                                                             | cytoplasm                                                            |
| <u>213443_at</u>   | ---                                                                        | ---         | ---                                                                                                                                                                                                   | ---                                                                                                                                                                          | ---                                                                  |
| <u>213873_at</u>   | ---                                                                        | ---         | ---                                                                                                                                                                                                   | ---                                                                                                                                                                          | ---                                                                  |

| ProbeSet ID        | Gene Title                                                                                                      | Gene Symbol  | GO Biological Process                                       | GO Molecular Function                                     | GO Cellular Component                           |
|--------------------|-----------------------------------------------------------------------------------------------------------------|--------------|-------------------------------------------------------------|-----------------------------------------------------------|-------------------------------------------------|
| <b>Mgene 74</b>    |                                                                                                                 |              |                                                             |                                                           |                                                 |
| <u>203850_s_at</u> | kinesin family member 1A                                                                                        | KIF1A        | microtubule-based movement anterograde axon cargo transport | microtubule motor activity ATP binding                    | microtubule associated complex                  |
| <u>203859_s_at</u> | paralemmin                                                                                                      | PALM         | cell motility regulation of cell shape                      | ---                                                       | integral to plasma membrane cytoplasmic vesicle |
| <u>205887_x_at</u> | mutS homolog 3 (E. coli)                                                                                        | MSH3         | mismatch repair                                             | damaged DNA binding ATP binding                           | ---                                             |
| <u>206186_at</u>   | membrane protein, palmitoylated 3 (MAGUK p55 subfamily member 3)                                                | MPP3         | signal transduction                                         | guanylate kinase activity protein binding                 | integral to plasma membrane                     |
| <u>207096_at</u>   | serum amyloid A4, constitutive                                                                                  | SAA4         | acute-phase response                                        | lipid transporter activity                                | extracellular region                            |
| <u>208008_at</u>   | DKFZP434O047 protein                                                                                            | DKFZP434O047 | ---                                                         | ---                                                       | ---                                             |
| <u>208755_x_at</u> | H3 histone, family 3A                                                                                           | H3F3A        | ---                                                         | ---                                                       | ---                                             |
| <u>210650_s_at</u> | ---                                                                                                             | ---          | ---                                                         | ---                                                       | ---                                             |
| <u>210785_s_at</u> | chromosome 1 open reading frame 38                                                                              | C1orf38      | cell adhesion                                               | ---                                                       | ---                                             |
| <u>211154_at</u>   | thrombopoietin (myeloproliferative leukemia virus oncogene ligand, megakaryocyte growth and development factor) | THPO         | development cell proliferation                              | cytokine activity hormone activity growth factor activity | extracellular region                            |
| <u>213650_at</u>   | golgin-67                                                                                                       | GOLGIN-67    | ---                                                         | ---                                                       | Golgi apparatus                                 |

| ProbeSet ID                 | Gene Title                                              | Gene Symbol | GO Biological Process                                                                                                        | GO Molecular Function                                                                                                                                                             | GO Cellular Component                                  |
|-----------------------------|---------------------------------------------------------|-------------|------------------------------------------------------------------------------------------------------------------------------|-----------------------------------------------------------------------------------------------------------------------------------------------------------------------------------|--------------------------------------------------------|
| <b>Mgene 41</b>             |                                                         |             |                                                                                                                              |                                                                                                                                                                                   |                                                        |
| <a href="#">201895_at</a>   | v-raf murine sarcoma 3611 viral oncogene homolog        | ARAF        | protein amino acid phosphorylation<br>intracellular signaling cascade                                                        | protein serine/threonine kinase activity<br>protein-tyrosine kinase activity<br>receptor signaling protein activity<br>ATP binding transferase activity<br>diacylglycerol binding | ---                                                    |
| <a href="#">204168_at</a>   | microsomal glutathione S-transferase 2                  | MGST2       | signal transduction cell-cell signaling<br>leukotriene biosynthesis antimicrobial humoral response (sensu Vertebrata)        | glutathione transferase activity<br>enzyme activator activity transferase activity                                                                                                | membrane fraction<br>microsome<br>integral to membrane |
| <a href="#">205844_at</a>   | vanin 1 vanin 1                                         | VNN1        | nitrogen compound metabolism cell motility                                                                                   | hydrolase activity, acting on carbon-nitrogen (but not peptide) bonds                                                                                                             | ---                                                    |
| <a href="#">206066_s_at</a> | RAD51 homolog C ( <i>S. cerevisiae</i> )                | RAD51C      | DNA repair DNA recombination                                                                                                 | damaged DNA binding ATP binding DNA-dependent ATPase activity                                                                                                                     | nucleus                                                |
| <a href="#">206143_at</a>   | solute carrier family 26, member 3                      | SLC26A3     | transport anion transport excretion sulfate transport                                                                        | transcription factor activity transcription cofactor activity transporter activity sulfate porter activity antiporter activity                                                    | membrane fraction<br>integral to membrane              |
| <a href="#">206370_at</a>   | phosphoinositide-3-kinase, catalytic, gamma polypeptide | PIK3CG      | G-protein coupled receptor protein signaling pathway                                                                         | inositol or phosphatidylinositol kinase activity phosphatidylinositol 3-kinase activity transferase activity phosphatidylinositol-4,5-bisphosphate 3-kinase activity              | phosphoinositide 3-kinase complex                      |
| <a href="#">207737_at</a>   | ---                                                     | ---         | ---                                                                                                                          | ---                                                                                                                                                                               | ---                                                    |
| <a href="#">209971_x_at</a> | JTV1 gene                                               | JTV1        | protein biosynthesis                                                                                                         | damaged DNA binding                                                                                                                                                               | ---                                                    |
| <a href="#">210431_at</a>   | alkaline phosphatase, placental-like 2                  | ALPPL2      | metabolism phosphorylation                                                                                                   | magnesium ion binding alkaline phosphatase activity hydrolase activity                                                                                                            | membrane                                               |
| <a href="#">210609_s_at</a> | tumor protein p53 inducible protein 3                   | TP53I3      | induction of apoptosis by oxidative stress                                                                                   | alcohol dehydrogenase activity, zinc-dependent zinc ion binding                                                                                                                   | ---                                                    |
| <a href="#">211062_s_at</a> | carboxypeptidase Z carboxypeptidase Z                   | CPZ         | proteolysis and peptidolysis development                                                                                     | carboxypeptidase A activity transmembrane receptor activity peptidase activity                                                                                                    | integral to membrane                                   |
| <a href="#">211369_at</a>   | ---                                                     | ---         | ---                                                                                                                          | ---                                                                                                                                                                               | ---                                                    |
| <a href="#">213188_s_at</a> | MYC induced nuclear antigen                             | MINA        | ---                                                                                                                          | ---                                                                                                                                                                               | nucleus                                                |
| <a href="#">213507_s_at</a> | karyopherin (importin) beta 1                           | KPNB1       | protein-nucleus import, docking protein-nucleus import, translocation NLS-bearing substrate-nucleus import protein transport | binding nuclear localization sequence binding zinc ion binding protein transporter activity                                                                                       | nucleus nuclear pore<br>cytoplasm                      |
| <a href="#">213517_at</a>   | Poly(rC) binding protein 2                              | PCBP2       | mRNA metabolism                                                                                                              | nucleic acid binding DNA binding RNA binding                                                                                                                                      | nucleus cytoplasm<br>ribonucleoprotein complex         |
| <a href="#">214207_s_at</a> | ---                                                     | ---         | ---                                                                                                                          | ---                                                                                                                                                                               | ---                                                    |

| ProbeSet ID        | Gene Title                                                    | Gene Symbol | GO Biological Process                                                                                                                                                                        | GO Molecular Function                                                                                                                  | GO Cellular Component                                                         |
|--------------------|---------------------------------------------------------------|-------------|----------------------------------------------------------------------------------------------------------------------------------------------------------------------------------------------|----------------------------------------------------------------------------------------------------------------------------------------|-------------------------------------------------------------------------------|
| <b>Mgene 69</b>    |                                                               |             |                                                                                                                                                                                              |                                                                                                                                        |                                                                               |
| <u>202964_s_at</u> | regulatory factor X, 5 (influences HLA class II expression)   | RFX5        | regulation of transcription, DNA-dependent transcription from Pol II promoter                                                                                                                | transcription factor activity transcription coactivator activity                                                                       | nucleus                                                                       |
| <u>203969_at</u>   | hypothetical protein LOC153914                                | LOC153914   | ---                                                                                                                                                                                          | ---                                                                                                                                    | ---                                                                           |
| <u>203971_at</u>   | solute carrier family 31 (copper transporters), member 1      | SLC31A1     | transport copper ion transport                                                                                                                                                               | copper ion transporter activity                                                                                                        | integral to plasma membrane                                                   |
| <u>206308_at</u>   | DNA (cytosine-5-)-methyltransferase 2                         | DNMT2       | DNA methylation                                                                                                                                                                              | DNA binding DNA (cytosine-5-)-methyltransferase activity                                                                               | nucleus                                                                       |
| <u>206691_s_at</u> | protein disulfide isomerase, pancreatic                       | PDIP        | electron transport protein folding protein-ER retention                                                                                                                                      | protein disulfide isomerase activity electron transporter activity isomerase activity                                                  | endoplasmic reticulum                                                         |
| <u>206692_at</u>   | potassium inwardly-rectifying channel, subfamily J, member 10 | KCNJ10      | ion transport potassium ion transport                                                                                                                                                        | voltage-gated ion channel activity potassium channel activity ATP binding ATP-activated inward rectifier potassium channel activity    | integral to plasma membrane                                                   |
| <u>206923_at</u>   | protein kinase C, alpha                                       | PRKCA       | regulation of cell cycle protein amino acid phosphorylation cell surface receptor linked signal transduction intracellular signaling cascade induction of apoptosis by extracellular signals | protein kinase C activity protein-tyrosine kinase activity calcium ion binding ATP binding transferase activity diacylglycerol binding | membrane fraction                                                             |
| <u>206924_at</u>   | interleukin 11                                                | IL11        | cell-cell signaling positive regulation of cell proliferation platelet activation B-cell differentiation megakaryocyte differentiation adipocyte differentiation                             | cytokine activity interleukin-11 receptor binding                                                                                      | extracellular region                                                          |
| <u>208902_s_at</u> | FLJ46061 protein                                              | FLJ46061    | ---                                                                                                                                                                                          | ---                                                                                                                                    | ---                                                                           |
| <u>209024_s_at</u> | synaptotagmin binding, cytoplasmic RNA interacting protein    | SYNCRIP     | nuclear mRNA splicing, via spliceosome RNA splicing                                                                                                                                          | RNA binding                                                                                                                            | nucleus endoplasmic reticulum ribonucleoprotein complex                       |
| <u>209252_at</u>   | histidyl-tRNA synthetase-like                                 | HARSL       | protein biosynthesis histidyl-tRNA aminoacylation                                                                                                                                            | histidine-tRNA ligase activity ATP binding ligase activity                                                                             | cytoplasm                                                                     |
| <u>212016_s_at</u> | polypyrimidine tract binding protein 1                        | PTBP1       | nuclear mRNA splicing, via spliceosome RNA splicing                                                                                                                                          | nucleic acid binding RNA binding poly-pyrimidine tract binding                                                                         | nucleus nucleoplasm nucleolus heterogeneous nuclear ribonucleoprotein complex |
| <u>212986_s_at</u> | tousled-like kinase 2                                         | TLK2        | regulation of chromatin assembly or disassembly protein amino acid phosphorylation response to DNA damage stimulus cell cycle intracellular signaling cascade chromatin modification         | protein serine/threonine kinase activity ATP binding transferase activity                                                              | nucleus                                                                       |
| <u>214082_at</u>   | carbonic anhydrase VB, mitochondrial                          | CA5B        | one-carbon compound metabolism                                                                                                                                                               | carbonate dehydratase activity zinc ion binding lyase activity                                                                         | mitochondrion                                                                 |

| ProbeSet ID        | Gene Title                                                     | Gene Symbol    | GO Biological Process                                                                                                                                                                                                         | GO Molecular Function                                                                       | GO Cellular Component                                             |
|--------------------|----------------------------------------------------------------|----------------|-------------------------------------------------------------------------------------------------------------------------------------------------------------------------------------------------------------------------------|---------------------------------------------------------------------------------------------|-------------------------------------------------------------------|
| <b>Mgene 86</b>    |                                                                |                |                                                                                                                                                                                                                               |                                                                                             |                                                                   |
| <u>203741_s_at</u> | adenylate cyclase 7                                            | ADCY7          | cAMP biosynthesis intracellular signaling cascade                                                                                                                                                                             | magnesium ion binding adenylate cyclase activity guanylate cyclase activity lyase activity  | integral to plasma membrane                                       |
| <u>204122_at</u>   | TYRO protein tyrosine kinase binding protein                   | TYROBP         | cellular defense response intracellular signaling cascade                                                                                                                                                                     | receptor activity receptor signaling protein activity                                       | integral to plasma membrane                                       |
| <u>204381_at</u>   | low density lipoprotein receptor-related protein 3             | LRP3           | receptor mediated endocytosis                                                                                                                                                                                                 | receptor activity                                                                           | coated pit integral to membrane                                   |
| <u>205339_at</u>   | TAL1 (SCL) interrupting locus                                  | SIL            | cell proliferation                                                                                                                                                                                                            | ---                                                                                         | ---                                                               |
| <u>207355_at</u>   | solute carrier family 1 (glutamate transporter), member 7      | SLC1A7         | transport dicarboxylic acid transport                                                                                                                                                                                         | L-glutamate transporter activity symporter activity sodium:dicarboxylate symporter activity | membrane integral to membrane                                     |
| <u>207606_s_at</u> | Rho GTPase activating protein 12                               | ARHGAP12       | ---                                                                                                                                                                                                                           | GTPase activator activity                                                                   | ---                                                               |
| <u>207723_s_at</u> | killer cell lectin-like receptor subfamily C, member 3         | KLRC3          | cellular defense response                                                                                                                                                                                                     | transmembrane receptor activity sugar binding                                               | integral to membrane                                              |
| <u>209590_at</u>   | Bone morphogenetic protein 7 (osteogenic protein 1)            | BMP7           | skeletal development growth                                                                                                                                                                                                   | cytokine activity growth factor activity                                                    | ---                                                               |
| <u>209751_s_at</u> | trafficking protein particle complex 2                         | TRAPPC2        | skeletal development transcription regulation of transcription, DNA-dependent transport ER to Golgi transport                                                                                                                 | intracellular transporter activity transcription factor binding                             | intracellular endoplasmic reticulum Golgi apparatus               |
| <u>210794_s_at</u> | maternally expressed 3 hypothetical gene supported by BX161452 | MEG3 LOC440199 | ---                                                                                                                                                                                                                           | ---                                                                                         | ---                                                               |
| <u>211326_x_at</u> | hemochromatosis                                                | HFE            | protein complex assembly transport iron ion transport iron ion homeostasis receptor mediated endocytosis antigen presentation antigen presentation, endogenous antigen antigen processing, endogenous antigen via MHC class I | MHC class I receptor activity                                                               | cytoplasm integral to plasma membrane MHC class I protein complex |
| <u>212169_at</u>   | FK506 binding protein 9, 63 kDa                                | FKBP9          | protein folding                                                                                                                                                                                                               | peptidyl-prolyl cis-trans isomerase activity calcium ion binding isomerase activity         | endoplasmic reticulum                                             |
| <u>212579_at</u>   | KIAA0650 protein                                               | KIAA0650       | glycolysis chromosome organization and biogenesis                                                                                                                                                                             | pyruvate kinase activity protein binding ATP binding                                        | nucleus chromosome                                                |
| <u>213143_at</u>   | hypothetical protein LOC257407                                 | LOC257407      | ---                                                                                                                                                                                                                           | ---                                                                                         | ---                                                               |
| <u>213433_at</u>   | ADP-ribosylation factor-like 3                                 | ARL3           | G-protein coupled receptor protein signaling pathway small GTPase mediated signal transduction                                                                                                                                | signal transducer activity GTP binding                                                      | ---                                                               |

| ProbeSet ID        | Gene Title                                       | Gene Symbol | GO Biological Process                                                                                                                                                      | GO Molecular Function                                                                                                                                                                        | GO Cellular Component                                                            |
|--------------------|--------------------------------------------------|-------------|----------------------------------------------------------------------------------------------------------------------------------------------------------------------------|----------------------------------------------------------------------------------------------------------------------------------------------------------------------------------------------|----------------------------------------------------------------------------------|
| <b>Mgene 35</b>    |                                                  |             |                                                                                                                                                                            |                                                                                                                                                                                              |                                                                                  |
| <u>202539_s_at</u> | 3-hydroxy-3-methylglutaryl-Coenzyme A reductase  | HMGR        | lipid metabolism cholesterol biosynthesis germ cell migration gonad development biosynthesis                                                                               | hydroxymethylglutaryl-CoA reductase (NADPH) activity oxidoreductase activity                                                                                                                 | membrane fraction peroxisome endoplasmic reticulum membrane integral to membrane |
| <u>203766_s_at</u> | leiomodlin 1 (smooth muscle)                     | LMOD1       | ---                                                                                                                                                                        | tropomyosin binding                                                                                                                                                                          | membrane fraction cytoskeleton                                                   |
| <u>206912_at</u>   | forkhead box E1 (thyroid transcription factor 2) | FOXE1       | negative regulation of transcription from Pol II promoter regulation of transcription, DNA-dependent transcription from Pol II promoter ectoderm development morphogenesis | transcription factor activity RNA polymerase II transcription factor activity                                                                                                                | nucleus                                                                          |
| <u>211165_x_at</u> | EPH receptor B2                                  | EPHB2       | protein amino acid phosphorylation transmembrane receptor protein tyrosine kinase signaling pathway neurogenesis                                                           | protein serine/threonine kinase activity protein-tyrosine kinase activity receptor activity ephrin receptor activity transmembrane-ephrin receptor activity ATP binding transferase activity | membrane integral to membrane                                                    |
| <u>213575_at</u>   | Transformer-2 alpha                              | TRA2A       | nuclear mRNA splicing, via spliceosome                                                                                                                                     | RNA binding pre-mRNA splicing factor activity                                                                                                                                                | nucleus                                                                          |

**Supplementary Table 3. Logistic regression analysis on the Duke (n = 89), ACOSOG (n = 25), and CALGB cohorts (n = 84) demonstrating the added prognostic value (OR – odds ratio) of the genomic model in comparison to known clinical predictors of outcome.**

**Duke Cohort (n = 89)**

| Predictor                                              | Univariate OR [95%CI] | p-value | Multivariate OR [95%CI] | p-value |
|--------------------------------------------------------|-----------------------|---------|-------------------------|---------|
| Age (yrs)                                              | 1.01 [0.96, 1.05]     | 0.750   | n/a                     | ---     |
| Gender:<br>Male                                        | 1.34 [0.56, 3.18]     | 0.509   | n/a                     | ---     |
| Cell Type:<br>Squamous cell                            | 1.10 [0.47, 2.53]     | 0.831   | n/a                     | ---     |
| Tumor size >3cm                                        | 2.29 [0.98, 5.39]     | 0.057   | 2.99 [0.52, 17.10]      | 0.219   |
| Lymph node status:<br>Positive                         | 2.47 [0.88, 6.89]     | 0.085   | 4.87 [0.69, 34.33]      | 0.112   |
| Pathologic stage:<br>Non-stage I                       | 3.28 [1.13, 9.48]     | 0.029   | 7.27 [1.02, 51.80]      | 0.048   |
| Genomic prediction<br>(>50% probability of recurrence) | 137 [29, 650]         | <0.0001 | 207 [32, 1348]          | <0.0001 |

**ACOSOG Cohort (n = 25)**

| Predictor                                              | Univariate OR [95%CI] | p-value | Multivariate OR [95%CI] | p-value |
|--------------------------------------------------------|-----------------------|---------|-------------------------|---------|
| Age (yrs)                                              | 0.97 [0.89, 1.04]     | 0.391   | n/a                     | ---     |
| Gender:<br>Male                                        | 2.57 [0.47, 14.10]    | 0.277   | n/a                     | ---     |
| Cell Type:<br>Squamous cell                            | 1.20 [0.25, 5.84]     | 0.821   | n/a                     | ---     |
| Tumor size (> 3cm)                                     | 0.84 [0.49, 1.44]     | 0.529   | n/a                     | ---     |
| Lymph node status:<br>Positive                         | 3.13 [0.47, 20.58]    | 0.236   | n/a                     | ---     |
| Pathologic stage:<br>Non-stage I                       | 3.13 [0.47, 20.58]    | 0.236   | n/a                     | ---     |
| Genomic prediction<br>(>50% probability of recurrence) | 35.90 [2.78, 463]     | 0.006   | 35.90 [2.78, 463]       | 0.006   |

**CALGB Cohort (n = 84)\*\***

| Predictor                                              | Univariate OR [95%CI] | p-value | Multivariate OR [95%CI] | p-value |
|--------------------------------------------------------|-----------------------|---------|-------------------------|---------|
| Age (yrs)                                              | 1.02 [0.98, 1.07]     | 0.304   | n/a                     | ---     |
| Gender:<br>Male                                        | 5.33 [1.87, 15.18]    | 0.002   | 4.95 [1.35, 18.116]     | 0.016   |
| Pathologic stage:<br>Non-stage I                       | 3.14 [1.26, 7.87]     | 0.014   | 4.15 [1.29, 13.41]      | 0.018   |
| Lymph node status:<br>Positive                         | 3.45 [1.27, 9.37]     | 0.015   | 4.59 [1.32, 15.98]      | 0.017   |
| Genomic prediction<br>(>50% probability of recurrence) | 16.1 [4.78, 54.23]    | <0.0001 | 15.81 [4.19, 59.75]     | <0.0001 |

*In both the Duke and CALGB datasets tumor size & lymph node status were analyzed separately from non-stage I variable in the multiple logistic regression analysis due to co-linearity.*

*\*\*Exact tumor size data was not available for the CALGB data. All samples included in the CALGB cohort were adenocarcinomas.*

# Supplementary Figure 1

A.

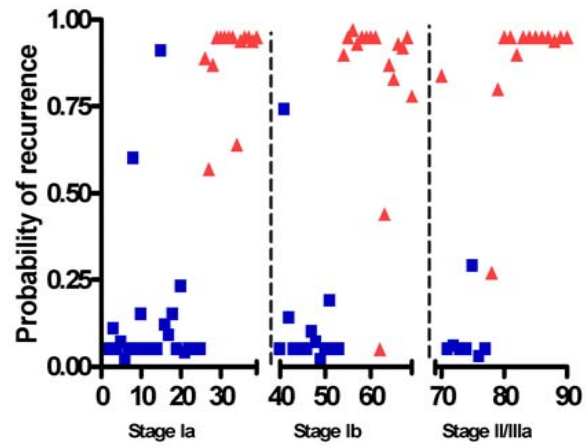

B.

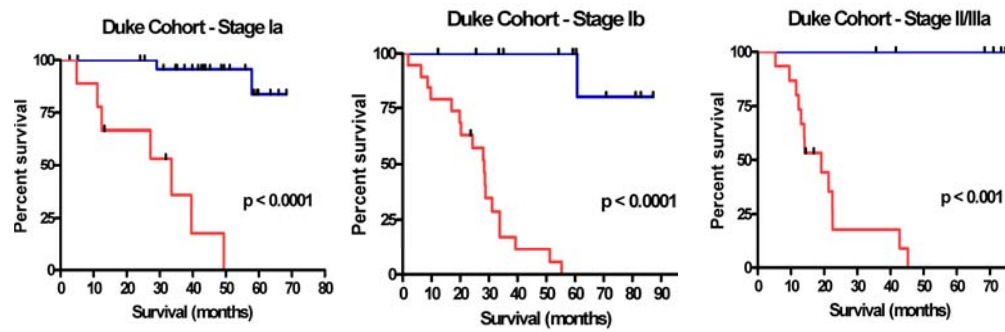

## Supplementary Figure 2

A.

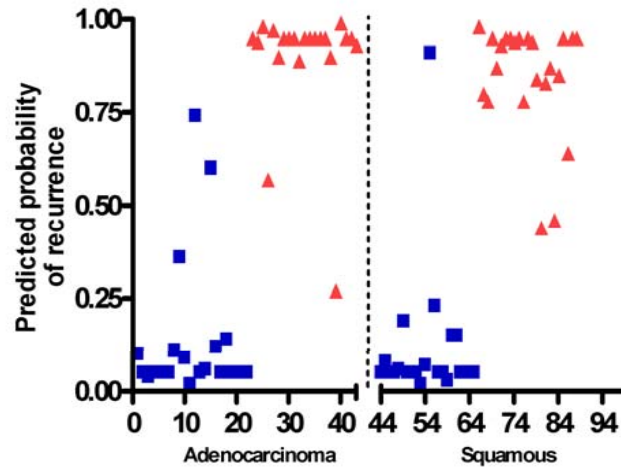

B.

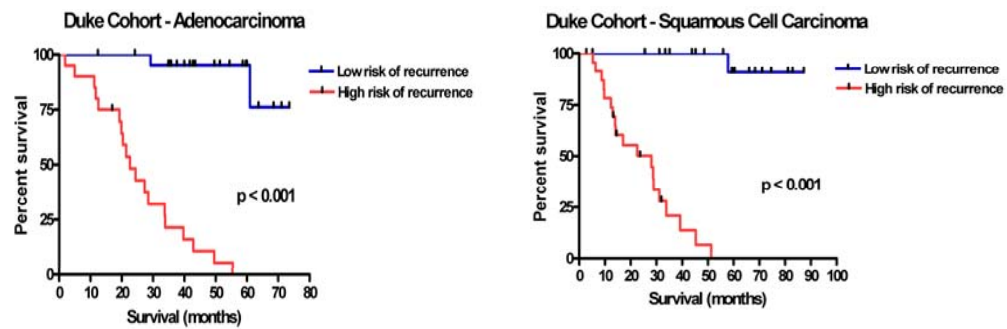

### Supplementary Figure 3

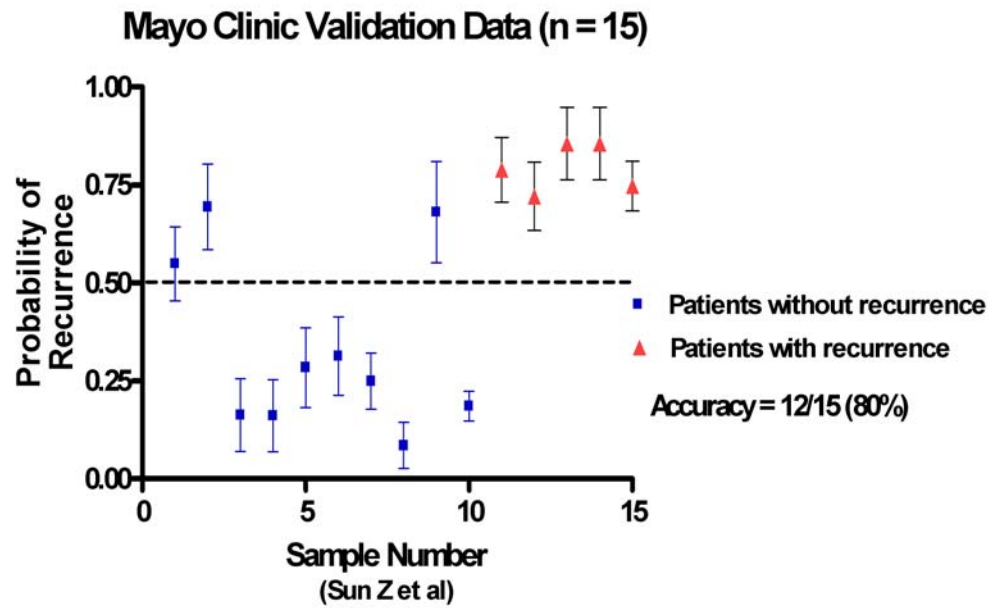

Supplement: nejm_potti_570sa1.pdf [file nejm_potti_570sa1.pdf]
